# Supplementary material
Source: HighWire-hosted journal article supplement (https://www.jneurosci.org/highwire/filestream/597841/field_highwire_adjunct_files/4/schott_et_al_suppl_new.pdf)
Supplement: schott_et_al_suppl_new.pdf [file schott_et_al_suppl_new.pdf]

## **Supplemental Online Material**

### **Methods: Genotyping**

Customized primers were obtained from Invitrogen (Carlsbad, CA), and Taq polymerase kits from Qiagen (Chatsworth, CA) were used for amplification.

#### **DAT1 VNTR:**

Primers (Vandenbergh et al.; 1):

- DATVNTR-f (5'-TGTGGTGTAGGAAACGGCCTGAG-3')
- DATVNTR-r (5'-CTTCCTGGAGGTCACGGCTCAAAGG-3')

Mix:

- 2 µl genomic DNA (100 ng/ml)
- 0.5 µl Taq polymerase
- 5 µl Q solution
- 2.5 µl Taq Buffer
- 2.5 µl DAT1VNTR-f
- 2.5 µl DAT1VNTR-r
- 1 µl dNTP
- 9 µl H<sub>2</sub>O

Protocol:

- 95 °C – 00:05:00
- 38 repetitions of:
  - o 94°C – 00:00:30
  - o 54°C – 00:00:30
  - o 72°C – 00:01:00
- 72°C – 00:10:00

The fragments (440 bp for the 9-repeat allele, 480 bp for the 10-repeat allele) were separated on an ethidium-bromide-stained agarose gel (2.5%) and visualized under UV light.

#### **COMT Val108/158Met polymorphism:**

Primers (DeMille et al.; 2):

- COMT-f (5'-GCCCCGCTGCTGTCACC-3')
- COMT-r (5'-CTGAGGGGCCTGGTGATAGTG-3')

Mix:

- 5 µl genomic DNA (100 ng/ml)
- 0.5 µl Taq polymerase
- 5 µl Q solution
- 2.5 µl Taq Buffer
- 2.5 µl COMT-f
- 2.5 µl COMT-r
- 0.5 µl dNTP
- 6.5 µl H<sub>2</sub>O

Protocol:

- 94°C – 00:01:00
- 42 repetitions of:
  - o 94°C – 00:00:30
  - o 60°C – 00:00:30
  - o 72°C – 00:00:30
- 72°C – 00:10:00

PCR products were digested with NlaIII at 37°C for three hours, yielding three fragments (114, 70 and 54 bp) for the Val allele and four fragments (96, 70, 54 and 18 bp) for the Met allele. The restriction fragments were separated on an ethidium-bromide-stained agarose gel (4.5%), and visualized under UV light. The Val and Met alleles were determined by the presence of a 114 bp fragment and a 96 bp fragment, respectively.

#### **References:**

1. Vandenbergh, D. J., Persico, A. M., Hawkins, A. L., Griffin, C. A., Li, X., Jabs, E. W. & Uhl, G. R. (1992) *Genomics* **14**, 1104-6.
2. DeMille, M. M., Kidd, J. R., Ruggeri, V., Palmatier, M. A., Goldman, D., Odunsi, A., Okonofua, F., Grigorenko, E., Schulz, L. O., Bonne-Tamir, B., Lu, R. B., Parnas, J., Pakstis, A. J. & Kidd, K. K. (2002) *Hum Genet* **111**, 521-37.
